# Supplementary material for: Bite force estimates in juvenile Tyrannosaurus rex based on simulated puncture marks
Source: PeerJ. 2021 Jun 2;9:e11450. doi: 10.7717/peerj.11450 (PMC8179241; doi:10.7717/peerj.11450)
Supplement: Supplemental Information 1 [file peerj-09-11450-s001.xlsx]

## Sheet: Trials
Trial	Element	Location	Puncture Speed (mm/sec)	Set Puncture Depth (mm)	Preload Force (N)		Max Force (N)	Vertical Displacement (mm)	Puncture Dimensions (mm)				Notes
					Set	@Test			Length	Width	Depth	Cortical Thickness (mm)
1	Right humerus	Cranial, mid-shaft	1	10	10	2.46	2931	4	2.8	3.7	4	4.42	Bone slipped, rapid decrease in force. Rostrocaudal axis of tooth parallel to long axis of bone. Relatively circular puncture.
2	Right humerus	20mm distally from trial 1 (midshaft)	1	10	10	6	8000	10	8.8	5.3	10	5.1	Rostrocaudal axis parallel to long axis of bone. Audible crack. Penetrated into trabecular bone.
3	Right humerus	20mm distomedially from trial 3 (midshaft)	1	10	50	28	3509	10	9.3	5.3	10	5	Approximately same force as t1, 2x depth. No cracking sound. Rostrocaudal axis of tooth parallel to long axis of bone.
4	Right humerus	20mm promximal to t1, midshaft	1	10	50	45.8	2830.95	10	8.3	5.7	10	4.7	Audible crack. Rostrocaudal axis of tooth parallel to long axis of bone.
5	Right humerus	20mm promximal to t6, midshaft	1	10	50	50.5	2432.3	10	8.8	5.2	10	3.7	No audible crack. Rostrocaudal axis of tooth parallel to long axis of bone.
6	Right humerus	20mm promximal to t7, base of humeral neck	1	10	50	42	1844.92	10	7.3	5.7	10	1.9	No audible crack. Rostrocaudal axis of tooth parallel to long axis of bone.
7	Right humerus	40mm promximal to t8, medial tuberosity behind humeral head	1	10	50	44.8	782.929	10	11	7.7	10	1.4	Measured with tooth still inserted. No audible crack. Rostrocaudal axis of tooth parallel to long axis of bone.
8	Right humerus	Caudal view, mid humeral head	1	10	50	45	4690.79	10	9.5	8	10	2	Measured with tooth inserted. Possible small crack? Rostrocaudal axis of tooth parallel to long axis of bone.
9	Right humerus	Base of humeral neck, 35 mm distal to t10.	1	10	50	48.3	4657.54	10	10.4	5.4	10	3.8	Measured with tooth inserted. No audible crack. Rostrocaudal axis of tooth parallel to long axis of bone.
10	Right humerus	Mid shaft 20 mm distal to t11	1	10	50	50	6463.85	10	8.5	5.6	10	5.3	Rostrocaudal axis of tooth parallel to long axis of bone. Loud crack.
11	Right humerus	Mid shaft 20 mm distal to t12	1	10	50	50	10024.6	7.9	5	5.6	7.9	15	Rostrocaudal axis of tooth parallel to long axis of bone. Soft crack. Stopped at max 10000N. Relatevely circular indentation.
12	Right humerus	Mid shaft 20 mm distal to t13	1	10	50	47	2094.83	10	11.9	3.8	~4	8.5	Rostrocaudal axis of tooth parallel to long axis of bone. Rotation of long axis of bone. Dull crack sound. Stab/pull motion. Seems similar to fossil marks.
13	Right humerus	Mid shaft 20 mm distal to t14	1	10	50	44	10028.7	8.5	6	3.4	8.5	9.9	Rostrocaudal axis of tooth parallel to long axis of bone. Small crack. Bone may be drying.
14	Right humerus	Mid shaft 60 mm distomedial to t15, along axis of epicondyle	1	10	50	37.16	3630.72	10	8.4	5	10	4.7	Rostrocaudal axis of tooth parallel to long axis of bone. No audible crack.
15	Left ulna	Medial side, between olecranon tuber and anconeal process on olecranon.	1	10	-	53.12	1202.62	10	10	8.1	10	3.1	Rostrocaudal axis of tooth perpendicular to long axis of bone. Measured with tooth in place.
16	Left ulna	Lateral side of olecranon between olcranon tuber and trochlear notch.	1	10	50	49.4	1263.62	10	6.9	5.2	6.8	3.2	Rostrocaudal axis of tooth perpendicular to long axis of bone. Soft tissue included. Measured with tooth in place. Sliding.
17	Left radius	Distal shaft, medial side.	1	10	-	55.4	2562.17	10	6.7	4.1	1	3.5	Rostrocaudal axis of tooth perpendicular to long axis of bone. Still in cortical bone. Tooth slid sideways. Indentation elongate perpendicular to long axis of bone.
18	Left humerus	Proximal cranial side.	10	5	50	43.5	1285.29	5.36	7.9	4.5	5	3.7	Rostrocaudal axis of tooth parallel to long axis of bone. Audible crack.
19	Left humerus	Proximal cranial side, 20 mm distal from t23	10	5	50	45	2930.4	5.3409	7.3	6.5	5.3409	3.7	Rostrocaudal axis of tooth perpendicular to long axis of bone. Measured with tooth in. Audible crack.
20	Left humerus	20 mm distal from t24 midshaft	10	35	-	53.78	10448.6	10.3897	8.8(5.5)	6.1(3.5)	10.3897(5.5)	5.3	Rostrocaudal axis of tooth perpendicular to long axis of bone. Measured with tooth in(removed). Penetrate max depth/force limit.
21	Left humerus	20 mm distal from t25 midshaft	16.6666	35	-	37.24	9024.41	35.8078	17.7(12.6)	10.8(9.1)	35.8018(24.3)	9	Rostrocaudal axis of tooth perpendicular to long axis of bone. Measured with tooth in(removed). Shattered lateral edge of indent. Scratch path on medial side of indent. Multiple loud dramatic cracking.
22	Left humerus	Proximal face of medial base of humeral head.	16.6666	35	-	34.58	3248.8	35.8391	20(17.7)	13.1(9.5)	35.8391(28.7)	4.5	Rostrocaudal axis of tooth perpendicular to long axis of bone. No cracking, oozed juice.
